# Supplementary material for: Parameters for the Analysis of Social Bonds in Horses
Source: MDPI journal article supplement (doi:10.3390/ani8110191), 2018-10-27
Supplement: s1 [file s1]

## Statistical Models

### Parameters for the analysis of social bonds in horses

Wolter R\*, Stefanski V., Krueger K.

\* Corresponding author: [Riccarda.Wolter@gmx.de](mailto:Riccarda.Wolter@gmx.de), Telephone: +49 6181 – 440 8789

Complete GLMMCall:

```
glm(formula = Grooming frequency ~ Approach frequency * Proximity frequency/Aggression/Group/Group.composition/Individual/P.F/Rank/Sex/Size, family = gaussian(identity), data = Dataset)
```

Deviance Residuals:

| Min     | 1Q     | Median | 3Q    | Max    |
|---------|--------|--------|-------|--------|
| -12.669 | -3.727 | -1.330 | 1.987 | 22.372 |

Coefficients:

|                                                                                    | Estimate   | Std. Error | t value | Pr(> t ) |
|------------------------------------------------------------------------------------|------------|------------|---------|----------|
| (Intercept                                                                         | 3.095e+00  | 1.229e+00  | 2.518   | 0.012 *  |
| Approaches                                                                         | 4.404e-01  | 1.855e-01  | 2.374   | 0.019 *  |
| Proximity                                                                          | 2.134e-02  | 3.837e-02  | 0.556   | 0.57902  |
| Approaches:Proximity                                                               | -1.166e-03 | 3.948e-03  | -0.295  | 0.76820  |
| Approaches:Proximity:Aggression                                                    | 1.359e-03  | 9.707e-04  | 1.400   | 0.16393  |
| Approaches:Proximity:Aggression:Group                                              | -7.727e-04 | 5.077e-04  | -1.522  | 0.13040  |
| Approaches:Proximity:Aggression:Group:Group.composition                            | 1.543e-04  | 1.319e-04  | 1.170   | 0.24412  |
| Approaches:Proximity:Aggression:Group:Group.composition:Individual                 | -2.222e-07 | 1.163e-06  | -0.191  | 0.84882  |
| Approaches:Proximity:Aggression:Group:Group.composition:Individual:P.F             | 5.073e-07  | 5.879e-07  | 0.863   | 0.38969  |
| Approaches:Proximity:Aggression:Group:Group.composition:Individual:P.F:Rang        | 6.583e-10  | 3.383e-08  | 0.019   | 0.98450  |
| Approaches:Proximity:Aggression:Group:Group.composition:Individual:P.F:Rang:Sex    | -2.271e-08 | 1.703e-08  | -1.334  | 0.18455  |
| Approach:Proximity:Aggression:Group:Group.composition:Individual:P.F:Rang:Sex:Size | 8.415e-10  | 3.218e-10  | 2.616   | 0.009**  |

---  
Signif. codes: 0 '\*\*\*' 0.001 '\*\*' 0.01 '\*' 0.05 '.' 0.1 ' ' 1

(Dispersion parameter for gaussian family taken to be 34.95904)

Null deviance: 6579.0 on 144 degrees of freedom  
Residual deviance: 4649.6 on 133 degrees of freedom  
AIC: 940.32

Reduced GLMM with lowest AIC

Call:

```
glm(formula = Grooming frequency ~ Approach frequency * Proximity frequency/Group.composition/P.F/Sex/Size,  
     family = gaussian(identity), data = Dataset)
```

Deviance Residuals:

| Min      | 1Q      | Median  | 3Q     | Max     |
|----------|---------|---------|--------|---------|
| -10.3949 | -3.7105 | -0.9086 | 2.2012 | 19.2137 |

Coefficients:

|                                                     | Estimate   | Std. Error | t value | Pr(> t ) |     |
|-----------------------------------------------------|------------|------------|---------|----------|-----|
| (Intercept)                                         | 1.8905318  | 1.1860616  | 1.594   | 0.113250 |     |
| Approaches                                          | 0.8174388  | 0.2084196  | 3.922   | 0.000138 | *** |
| Proximity                                           | 0.0424714  | 0.0368332  | 1.153   | 0.250887 |     |
| Approaches:Proximity                                | 0.0071064  | 0.0036463  | 1.949   | 0.053346 | .   |
| Approaches:Proximity:Group.composition              | -0.0070900 | 0.0046142  | -1.537  | 0.126710 |     |
| Approaches:Proximity:Group.composition:P.F          | -0.0011052 | 0.0030664  | -0.360  | 0.719080 |     |
| Approaches:Proximity:Group.composition:P.F:Sex      | -0.0035040 | 0.0012978  | -2.700  | 0.007809 | **  |
| Approaches:Proximity:Group.composition:P.F:Sex:Size | 0.0002409  | 0.0000566  | 4.255   | 3.85e-05 | *** |

---  
Signif. codes: 0 '\*\*\*' 0.001 '\*\*' 0.01 '\*' 0.05 '.' 0.1 ' ' 1

(Dispersion parameter for gaussian family taken to be 31.76881)

Null deviance: 6579.0 on 144 degrees of freedom  
Residual deviance: 4352.3 on 137 degrees of freedom  
AIC: 922.74

Complete GLM

```
Call:
glm(formula = Size ~ Approach frequency + Grooming frequency +
     Proximity frequency, family = gaussian(identity), data = Dataset)
```

Deviance Residuals:

| Min      | 1Q      | Median | 3Q     | Max    |
|----------|---------|--------|--------|--------|
| -14.2527 | -4.0024 | 0.1624 | 5.4185 | 9.0032 |

Coefficients:

|             | Estimate | Std. Error | t value | Pr(> t ) |     |
|-------------|----------|------------|---------|----------|-----|
| (Intercept) | 22.03370 | 0.98176    | 22.443  | < 2e-16  | *** |
| Approaches  | -0.33806 | 0.07523    | -4.494  | 1.45e-05 | *** |
| Grooming    | 0.17582  | 0.08342    | 2.108   | 0.0368   | *   |
| Proximity   | -0.15052 | 0.02580    | -5.834  | 3.55e-08 | *** |

---

Signif. codes: 0 '\*\*\*' 0.001 '\*\*' 0.01 '\*' 0.05 '.' 0.1 ' ' 1

(Dispersion parameter for gaussian family taken to be 35.99604)

Null deviance: 7170.7 on 144 degrees of freedom

Residual deviance: 5075.4 on 141 degrees of freedom

AIC: 937.03

Number of Fisher Scoring iterations: 2
