# Supplementary material for: Parameters for the Analysis of Social Bonds in Horses
Source: MDPI journal article supplement (doi:10.3390/ani8110191), 2018-10-27
Supplement: s1 [file s1]

| Pferd   | Individual | Group | Group composition | P/F | Rank | Proximity | Grooming | Approaches | Aggression | Group Size | Sex | sex nom |
|---------|------------|-------|-------------------|-----|------|-----------|----------|------------|------------|------------|-----|---------|
| Marlon  | 1          | 1     | 1                 | 1   | 1    | 60        | 33       | 25         | 5          | 5          | 1   | m       |
| Solongo | 2          | 1     | 1                 | 1   | 2    | 100       | 11       | 24         | 2          | 5          | 1   | m       |
| Vinter  | 3          | 1     | 1                 | 1   | 3    | 89        | 18       | 22         | 1          | 5          | 1   | m       |
| Xaran   | 4          | 1     | 1                 | 1   | 4    | 77        | 4        | 8          | 1          | 5          | 1   | m       |
| Kalmoek | 5          | 1     | 1                 | 1   | 5    | 83        | 11       | 9          | 1          | 5          | 1   | m       |
| Barioja | 6          | 2     | 2                 | 1   | 1    | 47        | 1        | 5          | 4          | 7          | 2   | f       |
| Abadia  | 7          | 2     | 2                 | 1   | 5    | 50        | 1        | 11         | 2          | 7          | 2   | f       |
| Ajala   | 8          | 2     | 2                 | 1   | 2    | 58        | 1        | 17         | 7          | 7          | 2   | f       |
| Ginger  | 9          | 2     | 2                 | 1   | 3    | 42        | 4        | 7          | 4          | 7          | 2   | f       |
| Galinka | 10         | 2     | 2                 | 1   | 6    | 53        | 5        | 13         | 8          | 7          | 2   | f       |
| Sira    | 11         | 2     | 2                 | 1   | 4    | 46        | 0        | 9          | 5          | 7          | 2   | f       |
| Ilonka  | 12         | 2     | 2                 | 1   | 7    | 38        | 1        | 4          | 3          | 7          | 2   | f       |
| Barioja | 6          | 3     | 3                 | 1   | 1    | 11        | 0        | 4          | 3          | 6          | 2   | f       |
| Galinka | 10         | 3     | 3                 | 1   | 5    | 13        | 1        | 0          | 0          | 6          | 2   | f       |
| Ginger  | 9          | 3     | 3                 | 1   | 2    | 25        | 2        | 2          | 5          | 6          | 2   | f       |
| Ilonka  | 1          | 3     | 3                 | 1   | 3    | 22        | 3        | 1          | 3          | 6          | 2   | f       |
| Fury    | 17         | 3     | 3                 | 1   | 4    | 19        | 3        | 5          | 1          | 6          | 1   | m       |
| Oleg    | 18         | 3     | 3                 | 1   | 6    | 44        | 3        | 4          | 2          | 6          | 1   | m       |
| Maul    | 19         | 4     | 2                 | 1   | 1    | 38        | 6        | 7          | 7          | 9          | 2   | f       |
| Chrissi | 20         | 4     | 2                 | 1   | 8    | 67        | 6        | 3          | 6          | 9          | 2   | f       |
| Marie   | 21         | 4     | 2                 | 1   | 7    | 83        | 11       | 1          | 22         | 9          | 2   | f       |
| Ajala   | 8          | 4     | 2                 | 1   | 3    | 68        | 5        | 8          | 22         | 9          | 2   | f       |
| Nele    | 23         | 4     | 2                 | 1   | 4    | 94        | 4        | 0          | 3          | 9          | 2   | f       |
| Jana    | 24         | 4     | 2                 | 1   | 5    | 78        | 0        | 0          | 3          | 9          | 2   | f       |
| Schweif | 25         | 4     | 2                 | 1   | 9    | 73        | 9        | 2          | 0          | 9          | 2   | f       |
| Sira    | 11         | 4     | 2                 | 1   | 2    | 79        | 0        | 3          | 36         | 9          | 2   | f       |
| Abadia  | 7          | 4     | 2                 | 1   | 6    | 39        | 0        | 0          | 2          | 9          | 2   | f       |
| Aytan   | 28         | 5     | 3                 | 1   | 3    | 20        | 11       | 40         | 50         | 9          | 1   | m       |
| Calgary | 29         | 5     | 3                 | 1   | 6    | 22        | 20       | 14         | 31         | 9          | 2   | f       |
| Leila   | 30         | 5     | 3                 | 1   | 4    | 10        | 5        | 12         | 37         | 9          | 2   | f       |
| Nadja   | 31         | 5     | 3                 | 1   | 9    | 21        | 19       | 24         | 25         | 9          | 2   | f       |
| Fumir   | 32         | 5     | 3                 | 1   | 1    | 10        | 6        | 4          | 47         | 9          | 2   | f       |

|       |    |   |   |   |    |    |    |    |    |    |   |   |
|-------|----|---|---|---|----|----|----|----|----|----|---|---|
| Holly | 33 | 5 | 3 | 1 | 2  | 21 | 15 | 12 | 44 | 9  | 2 | f |
| Leika | 34 | 5 | 3 | 1 | 5  | 17 | 9  | 19 | 51 | 9  | 2 | f |
| Olga  | 35 | 5 | 3 | 1 | 7  | 20 | 8  | 18 | 50 | 9  | 2 | f |
| Otto  | 36 | 5 | 3 | 1 | 8  | 18 | 11 | 30 | 23 | 9  | 1 | m |
| 1     | 37 | 6 | 3 | 2 | 3  | 30 | 2  | 3  | 47 | 23 | 2 | f |
| 2     | 38 | 6 | 3 | 2 | 14 | 28 | 1  | 5  | 19 | 23 | 2 | f |
| 3     | 39 | 6 | 3 | 2 | 15 | 25 | 4  | 7  | 15 | 23 | 2 | f |
| 6     | 40 | 6 | 3 | 2 | 17 | 18 | 1  | 0  | 16 | 23 | 2 | f |
| 7     | 41 | 6 | 3 | 2 | 6  | 27 | 5  | 0  | 39 | 23 | 2 | f |
| 9     | 42 | 6 | 3 | 2 | 11 | 23 | 4  | 2  | 7  | 23 | 2 | f |
| 10    | 43 | 6 | 3 | 2 | 20 | 25 | 4  | 11 | 4  | 23 | 2 | f |
| 11    | 44 | 6 | 3 | 2 | 7  | 53 | 3  | 0  | 48 | 23 | 2 | f |
| 12    | 45 | 6 | 3 | 2 | 13 | 43 | 9  | 7  | 28 | 23 | 1 | m |
| 13    | 46 | 6 | 3 | 2 | 12 | 31 | 6  | 9  | 15 | 23 | 2 | f |
| 14    | 47 | 6 | 3 | 2 | 5  | 34 | 25 | 11 | 44 | 23 | 2 | f |
| 15    | 48 | 6 | 3 | 2 | 10 | 27 | 20 | 14 | 16 | 23 | 2 | f |
| 16    | 49 | 6 | 3 | 2 | 1  | 35 | 11 | 9  | 50 | 23 | 2 | f |
| 17    | 50 | 6 | 3 | 2 | 2  | 21 | 6  | 12 | 20 | 23 | 2 | f |
| 18    | 51 | 6 | 3 | 2 | 4  | 25 | 2  | 4  | 73 | 23 | 2 | f |
| 19    | 52 | 6 | 3 | 2 | 19 | 16 | 0  | 3  | 12 | 23 | 2 | f |
| 20    | 53 | 6 | 3 | 2 | 18 | 20 | 1  | 2  | 9  | 23 | 2 | f |
| 21    | 54 | 6 | 3 | 2 | 16 | 20 | 0  | 3  | 30 | 23 | 2 | f |
| 22    | 55 | 6 | 3 | 2 | 9  | 27 | 5  | 1  | 19 | 23 | 2 | f |
| 23    | 56 | 6 | 3 | 2 | 8  | 26 | 2  | 2  | 34 | 23 | 2 | f |
| 24    | 57 | 6 | 3 | 2 | 23 | 32 | 7  | 6  | 1  | 23 | 2 | f |
| 25    | 58 | 6 | 3 | 2 | 21 | 32 | 29 | 7  | 2  | 23 | 2 | f |
| 26    | 59 | 6 | 3 | 2 | 22 | 26 | 21 | 5  | 7  | 23 | 2 | f |
| 1     | 60 | 7 | 3 | 2 | 2  | 10 | 10 | 16 | 44 | 10 | 1 | m |
| 2     | 61 | 7 | 3 | 2 | 8  | 11 | 9  | 10 | 9  | 10 | 2 | f |
| 3     | 62 | 7 | 3 | 2 | 3  | 10 | 1  | 4  | 26 | 10 | 2 | f |
| 4     | 63 | 7 | 3 | 2 | 4  | 8  | 0  | 3  | 19 | 10 | 2 | f |
| 5     | 64 | 7 | 3 | 2 | 5  | 10 | 11 | 15 | 42 | 10 | 2 | f |
| 6     | 65 | 7 | 3 | 2 | 9  | 13 | 4  | 11 | 7  | 10 | 2 | f |

|    |    |   |   |   |    |    |    |    |    |    |   |   |
|----|----|---|---|---|----|----|----|----|----|----|---|---|
| 7  | 66 | 7 | 3 | 2 | 10 | 14 | 4  | 4  | 2  | 10 | 2 | f |
| 8  | 67 | 7 | 3 | 2 | 7  | 4  | 1  | 8  | 18 | 10 | 2 | f |
| 9  | 68 | 7 | 3 | 2 | 6  | 11 | 6  | 3  | 17 | 10 | 2 | f |
| 10 | 69 | 7 | 3 | 2 | 1  | 4  | 4  | 4  | 61 | 10 | 2 | f |
| 1  | 70 | 8 | 3 | 2 | 2  | 13 | 15 | 14 | 27 | 12 | 1 | m |
| 2  | 71 | 8 | 3 | 2 | 3  | 23 | 3  | 19 | 34 | 12 | 2 | f |
| 5  | 72 | 8 | 3 | 2 | 7  | 21 | 8  | 17 | 30 | 12 | 2 | f |
| 6  | 73 | 8 | 3 | 2 | 9  | 12 | 2  | 4  | 17 | 12 | 2 | f |
| 9  | 74 | 8 | 3 | 2 | 1  | 18 | 14 | 35 | 24 | 12 | 2 | f |
| 10 | 75 | 8 | 3 | 2 | 4  | 14 | 0  | 6  | 24 | 12 | 2 | f |
| 12 | 76 | 8 | 3 | 2 | 8  | 12 | 17 | 7  | 17 | 12 | 2 | f |
| 13 | 77 | 8 | 3 | 2 | 6  | 10 | 2  | 1  | 14 | 12 | 2 | f |
| 14 | 78 | 8 | 3 | 2 | 10 | 17 | 2  | 22 | 23 | 12 | 2 | f |
| 15 | 79 | 8 | 3 | 2 | 11 | 15 | 19 | 6  | 32 | 12 | 2 | f |
| 16 | 80 | 8 | 3 | 2 | 5  | 23 | 4  | 22 | 41 | 12 | 2 | f |
| 17 | 81 | 8 | 3 | 2 | 12 | 26 | 4  | 9  | 21 | 12 | 2 | f |
| 1  | 82 | 9 | 3 | 2 | 6  | 25 | 17 | 27 | 17 | 19 | 1 | m |
| 2  | 83 | 9 | 3 | 2 | 10 | 14 | 6  | 5  | 24 | 19 | 2 | f |
| 3  | 84 | 9 | 3 | 2 | 16 | 17 | 8  | 3  | 13 | 19 | 2 | f |
| 4  | 85 | 9 | 3 | 2 | 15 | 14 | 2  | 4  | 13 | 19 | 2 | f |
| 5  | 86 | 9 | 3 | 2 | 14 | 12 | 1  | 5  | 22 | 19 | 2 | f |
| 6  | 87 | 9 | 3 | 2 | 11 | 21 | 16 | 19 | 20 | 19 | 2 | f |
| 9  | 88 | 9 | 3 | 2 | 9  | 28 | 1  | 8  | 25 | 19 | 2 | f |
| 10 | 89 | 9 | 3 | 2 | 12 | 23 | 16 | 14 | 25 | 19 | 2 | f |
| 11 | 90 | 9 | 3 | 2 | 19 | 15 | 0  | 2  | 9  | 19 | 2 | f |
| 12 | 91 | 9 | 3 | 2 | 1  | 24 | 13 | 7  | 21 | 19 | 2 | f |
| 14 | 92 | 9 | 3 | 2 | 5  | 27 | 19 | 16 | 28 | 19 | 2 | f |
| 15 | 93 | 9 | 3 | 2 | 13 | 11 | 1  | 3  | 7  | 19 | 2 | f |
| 16 | 94 | 9 | 3 | 2 | 2  | 22 | 14 | 6  | 27 | 19 | 2 | f |
| 17 | 95 | 9 | 3 | 2 | 8  | 16 | 4  | 4  | 32 | 19 | 2 | f |
| 18 | 96 | 9 | 3 | 2 | 7  | 13 | 0  | 2  | 17 | 19 | 2 | f |
| 19 | 97 | 9 | 3 | 2 | 3  | 24 | 10 | 14 | 29 | 19 | 2 | f |
| 20 | 98 | 9 | 3 | 2 | 4  | 21 | 2  | 2  | 21 | 19 | 2 | f |

|    |     |    |   |   |    |    |    |    |    |    |   |   |
|----|-----|----|---|---|----|----|----|----|----|----|---|---|
| 21 | 99  | 9  | 3 | 2 | 17 | 19 | 5  | 2  | 26 | 19 | 2 | f |
| 22 | 100 | 9  | 3 | 2 | 18 | 9  | 0  | 6  | 20 | 19 | 2 | f |
| 1  | 101 | 10 | 3 | 2 | 2  | 9  | 9  | 7  | 37 | 26 | 1 | m |
| 2  | 102 | 10 | 3 | 2 | 17 | 19 | 4  | 0  | 23 | 26 | 2 | f |
| 3  | 103 | 10 | 3 | 2 | 8  | 17 | 1  | 1  | 19 | 26 | 2 | f |
| 4  | 104 | 10 | 3 | 2 | 9  | 12 | 0  | 1  | 11 | 26 | 2 | f |
| 5  | 105 | 10 | 3 | 2 | 5  | 6  | 2  | 4  | 27 | 26 | 2 | f |
| 6  | 106 | 10 | 3 | 2 | 3  | 20 | 2  | 1  | 16 | 26 | 2 | f |
| 7  | 107 | 10 | 3 | 2 | 25 | 12 | 0  | 2  | 10 | 26 | 2 | f |
| 8  | 108 | 10 | 3 | 2 | 1  | 15 | 10 | 6  | 21 | 26 | 2 | f |
| 10 | 109 | 10 | 3 | 2 | 13 | 12 | 2  | 3  | 14 | 26 | 2 | f |
| 11 | 110 | 10 | 3 | 2 | 6  | 11 | 2  | 0  | 10 | 26 | 2 | f |
| 13 | 111 | 10 | 3 | 2 | 18 | 11 | 2  | 8  | 25 | 26 | 2 | f |
| 14 | 112 | 10 | 3 | 2 | 21 | 13 | 0  | 2  | 15 | 26 | 2 | f |
| 16 | 113 | 10 | 3 | 2 | 19 | 17 | 0  | 0  | 1  | 26 | 2 | f |
| 17 | 114 | 10 | 3 | 2 | 14 | 11 | 8  | 2  | 13 | 26 | 2 | f |
| 18 | 115 | 10 | 3 | 2 | 12 | 10 | 6  | 9  | 24 | 26 | 2 | f |
| 19 | 116 | 10 | 3 | 2 | 16 | 19 | 3  | 8  | 19 | 26 | 2 | f |
| 20 | 117 | 10 | 3 | 2 | 10 | 15 | 13 | 7  | 14 | 26 | 2 | f |
| 21 | 118 | 10 | 3 | 2 | 4  | 3  | 2  | 4  | 32 | 26 | 2 | f |
| 22 | 119 | 10 | 3 | 2 | 7  | 9  | 14 | 5  | 8  | 26 | 2 | f |
| 23 | 120 | 10 | 3 | 2 | 11 | 11 | 1  | 1  | 19 | 26 | 2 | f |
| 26 | 121 | 10 | 3 | 2 | 20 | 11 | 3  | 3  | 11 | 26 | 2 | f |
| 28 | 122 | 10 | 3 | 2 | 23 | 1  | 0  | 0  | 9  | 26 | 2 | f |
| 32 | 123 | 10 | 3 | 2 | 15 | 21 | 6  | 6  | 19 | 26 | 2 | f |
| 33 | 124 | 10 | 3 | 2 | 22 | 28 | 14 | 7  | 36 | 26 | 2 | f |
| 34 | 125 | 10 | 3 | 2 | 26 | 18 | 5  | 2  | 13 | 26 | 2 | f |
| 35 | 126 | 10 | 3 | 2 | 24 | 19 | 5  | 2  | 11 | 26 | 2 | f |
| 1  | 127 | 11 | 3 | 2 | 3  | 15 | 19 | 21 | 20 | 19 | 1 | m |
| 6  | 128 | 11 | 3 | 2 | 8  | 13 | 9  | 5  | 5  | 19 | 2 | f |
| 7  | 129 | 11 | 3 | 2 | 5  | 19 | 20 | 8  | 17 | 19 | 2 | f |
| 8  | 130 | 11 | 3 | 2 | 6  | 11 | 4  | 5  | 14 | 19 | 2 | f |
| 10 | 131 | 11 | 3 | 2 | 4  | 9  | 17 | 7  | 29 | 19 | 2 | f |

|    |     |    |   |   |    |    |    |    |    |    |   |   |
|----|-----|----|---|---|----|----|----|----|----|----|---|---|
| 11 | 132 | 11 | 3 | 2 | 9  | 21 | 10 | 4  | 38 | 19 | 2 | f |
| 13 | 133 | 11 | 3 | 2 | 10 | 16 | 5  | 1  | 15 | 19 | 2 | f |
| 15 | 134 | 11 | 3 | 2 | 11 | 12 | 9  | 5  | 6  | 19 | 2 | f |
| 17 | 135 | 11 | 3 | 2 | 13 | 15 | 13 | 1  | 6  | 19 | 2 | f |
| 18 | 136 | 11 | 3 | 2 | 7  | 14 | 22 | 4  | 13 | 19 | 2 | f |
| 19 | 137 | 11 | 3 | 2 | 1  | 16 | 16 | 16 | 20 | 19 | 2 | f |
| 20 | 138 | 11 | 3 | 2 | 2  | 15 | 16 | 12 | 25 | 19 | 2 | f |
| 22 | 139 | 11 | 3 | 2 | 14 | 23 | 6  | 5  | 12 | 19 | 2 | f |
| 23 | 140 | 11 | 3 | 2 | 16 | 28 | 4  | 19 | 36 | 19 | 2 | f |
| 24 | 141 | 11 | 3 | 2 | 17 | 17 | 4  | 11 | 18 | 19 | 2 | f |
| 25 | 142 | 11 | 3 | 2 | 15 | 24 | 9  | 25 | 46 | 19 | 2 | f |
| 26 | 143 | 11 | 3 | 2 | 12 | 27 | 14 | 8  | 37 | 19 | 2 | f |
| 27 | 144 | 11 | 3 | 2 | 18 | 23 | 17 | 6  | 10 | 19 | 2 | f |
| 28 | 145 | 11 | 3 | 2 | 19 | 20 | 12 | 6  | 8  | 19 | 2 | f |
